# Supplementary material for: Modelling Soil Compaction Parameters Using an Enhanced Hybrid Intelligence Paradigm of ANFIS and Improved Grey Wolf Optimiser
Source: MDPI journal article supplement (doi:10.3390/math11143064), 2023-07-11
Supplement: s1 [file s1]

| Study reference | Soil types | F (%) | S (%) | G (%) | LL (%) | PL (%) | OMC (%) | MDD (kN/m <sup>3</sup> ) |
|-----------------|------------|-------|-------|-------|--------|--------|---------|--------------------------|
| <b>Study-1</b>  |            |       |       |       |        |        |         |                          |
| Günaydın (2009) | CH         | 63.50 | 30.75 | 5.75  | 54.50  | 24.44  | 20.79   | 15.02                    |
| Günaydın (2009) | CH         | 74.00 | 24.45 | 1.55  | 56.75  | 23.49  | 25.00   | 14.03                    |
| Günaydın (2009) | CH         | 72.50 | 24.14 | 3.36  | 51.60  | 23.57  | 21.50   | 15.26                    |
| Günaydın (2009) | CH         | 79.50 | 19.27 | 1.23  | 54.20  | 25.28  | 22.00   | 15.22                    |
| Günaydın (2009) | CH         | 56.00 | 33.50 | 10.50 | 53.20  | 28.09  | 19.30   | 17.42                    |
| Günaydın (2009) | CH         | 61.00 | 29.35 | 9.65  | 51.20  | 22.03  | 19.30   | 16.85                    |
| Günaydın (2009) | CH         | 60.00 | 21.78 | 18.22 | 51.30  | 28.64  | 18.80   | 16.89                    |
| Günaydın (2009) | CH         | 75.00 | 23.35 | 1.65  | 55.15  | 28.04  | 26.00   | 14.39                    |
| Günaydın (2009) | CH         | 75.00 | 23.35 | 1.65  | 55.15  | 28.04  | 26.00   | 14.39                    |
| Günaydın (2009) | CH         | 75.00 | 15.98 | 9.02  | 55.60  | 27.48  | 24.00   | 15.42                    |
| Günaydın (2009) | CH         | 60.00 | 23.15 | 16.85 | 55.00  | 26.87  | 21.50   | 16.71                    |
| Günaydın (2009) | CH         | 57.00 | 23.75 | 19.25 | 53.85  | 27.46  | 21.55   | 16.14                    |
| Günaydın (2009) | CH         | 57.00 | 41.16 | 1.84  | 52.90  | 27.23  | 17.50   | 16.08                    |
| Günaydın (2009) | CI         | 66.00 | 30.23 | 3.77  | 49.10  | 25.20  | 17.30   | 15.78                    |
| Günaydın (2009) | CI         | 70.00 | 25.30 | 4.70  | 43.90  | 24.40  | 16.00   | 16.60                    |
| Günaydın (2009) | CI         | 65.00 | 24.94 | 10.06 | 47.15  | 21.78  | 17.40   | 16.19                    |
| Günaydın (2009) | CI         | 49.00 | 44.81 | 6.19  | 44.60  | 24.09  | 17.90   | 17.97                    |
| Günaydın (2009) | CI         | 56.00 | 33.89 | 10.11 | 46.35  | 25.45  | 19.90   | 16.87                    |
| Günaydın (2009) | CI         | 53.00 | 42.44 | 4.56  | 48.25  | 25.47  | 17.20   | 17.44                    |
| Günaydın (2009) | CI         | 57.00 | 38.58 | 4.42  | 47.55  | 25.90  | 16.40   | 17.09                    |
| Günaydın (2009) | CI         | 50.00 | 27.23 | 22.77 | 44.10  | 21.72  | 16.60   | 17.71                    |
| Günaydın (2009) | CI         | 59.00 | 35.62 | 5.38  | 40.15  | 25.67  | 16.30   | 18.04                    |
| Günaydın (2009) | CI         | 55.00 | 36.80 | 8.20  | 39.45  | 24.09  | 18.80   | 16.28                    |
| Günaydın (2009) | CI         | 52.00 | 37.28 | 10.72 | 44.70  | 24.64  | 18.40   | 15.92                    |
| Günaydın (2009) | CI         | 74.00 | 23.91 | 2.09  | 41.70  | 23.65  | 19.20   | 16.06                    |
| Günaydın (2009) | CI         | 64.00 | 29.72 | 6.28  | 40.00  | 23.09  | 17.90   | 16.53                    |
| Günaydın (2009) | CI         | 64.00 | 29.72 | 6.28  | 40.00  | 23.09  | 17.90   | 16.53                    |
| Günaydın (2009) | CI         | 75.00 | 24.52 | 0.48  | 44.35  | 26.48  | 21.85   | 15.19                    |
| Günaydın (2009) | CI         | 75.00 | 24.20 | 0.80  | 44.35  | 26.48  | 21.85   | 15.19                    |
| Günaydın (2009) | CI         | 67.00 | 32.82 | 0.18  | 37.20  | 16.93  | 16.50   | 17.36                    |
| Günaydın (2009) | CI         | 63.00 | 36.85 | 0.15  | 36.55  | 16.71  | 15.00   | 17.73                    |
| Günaydın (2009) | CI         | 61.00 | 36.76 | 2.24  | 35.15  | 15.44  | 15.80   | 17.36                    |
| Günaydın (2009) | CI         | 66.00 | 32.29 | 1.71  | 35.30  | 15.47  | 16.90   | 16.95                    |
| Günaydın (2009) | CI         | 67.00 | 32.82 | 0.18  | 37.20  | 16.93  | 16.50   | 17.36                    |
| Günaydın (2009) | CI         | 63.00 | 36.85 | 0.15  | 36.55  | 16.71  | 15.00   | 17.73                    |
| Günaydın (2009) | CI         | 61.00 | 36.76 | 2.24  | 35.15  | 15.44  | 15.80   | 17.36                    |
| Günaydın (2009) | CI         | 66.00 | 32.29 | 1.71  | 35.30  | 15.47  | 16.90   | 16.95                    |
| Günaydın (2009) | CI         | 65.00 | 28.08 | 6.92  | 36.30  | 14.40  | 15.60   | 17.24                    |
| Günaydın (2009) | CI         | 54.00 | 22.93 | 23.07 | 43.40  | 23.45  | 19.75   | 16.65                    |
| Günaydın (2009) | CI         | 52.50 | 43.47 | 4.03  | 35.45  | 18.60  | 13.95   | 19.41                    |
| Günaydın (2009) | CI         | 55.00 | 44.95 | 0.05  | 36.25  | 18.72  | 14.80   | 18.49                    |
| Günaydın (2009) | CI         | 54.00 | 33.65 | 12.35 | 35.20  | 20.48  | 14.30   | 18.77                    |
| Günaydın (2009) | CI         | 54.00 | 38.97 | 7.03  | 47.00  | 23.77  | 16.80   | 17.91                    |
| Günaydın (2009) | CI         | 61.00 | 34.84 | 4.16  | 38.40  | 20.75  | 15.30   | 18.73                    |
| Günaydın (2009) | CI         | 57.00 | 28.65 | 14.35 | 46.05  | 24.90  | 20.70   | 17.05                    |
| Günaydın (2009) | CI         | 56.00 | 34.97 | 9.03  | 49.40  | 26.72  | 23.75   | 16.17                    |

| Study reference | Soil types | F (%) | S (%) | G (%) | LL (%) | PL (%) | OMC (%) | MDD (kN/m <sup>3</sup> ) |
|-----------------|------------|-------|-------|-------|--------|--------|---------|--------------------------|
| Günaydın (2009) | CL         | 49.00 | 38.54 | 12.46 | 34.90  | 20.04  | 15.20   | 17.96                    |
| Günaydın (2009) | CL         | 67.00 | 20.67 | 12.33 | 34.00  | 16.20  | 14.30   | 17.49                    |
| Günaydın (2009) | CL         | 70.00 | 28.86 | 1.14  | 34.50  | 18.82  | 17.60   | 17.44                    |
| Günaydın (2009) | CL         | 52.00 | 28.98 | 19.02 | 32.40  | 17.46  | 16.50   | 17.79                    |
| Günaydın (2009) | CL         | 54.00 | 38.40 | 7.60  | 32.10  | 17.99  | 15.80   | 17.27                    |
| Günaydın (2009) | CL         | 70.00 | 18.77 | 11.23 | 34.80  | 19.23  | 15.20   | 17.38                    |
| Günaydın (2009) | CL         | 75.00 | 24.66 | 0.34  | 33.70  | 18.04  | 16.10   | 17.15                    |
| Günaydın (2009) | CL         | 49.00 | 32.40 | 18.60 | 33.50  | 20.45  | 14.30   | 17.21                    |
| Günaydın (2009) | CL         | 57.50 | 40.00 | 2.50  | 29.50  | 21.62  | 13.60   | 17.64                    |
| Günaydın (2009) | CL         | 57.50 | 40.00 | 2.50  | 29.50  | 21.62  | 13.60   | 17.64                    |
| Günaydın (2009) | CL         | 51.00 | 47.22 | 1.78  | 32.45  | 17.79  | 13.30   | 18.09                    |
| Günaydın (2009) | CL         | 51.00 | 47.22 | 1.78  | 33.45  | 17.79  | 13.30   | 18.09                    |
| Günaydın (2009) | CL         | 64.00 | 35.95 | 0.05  | 34.40  | 16.76  | 17.50   | 16.93                    |
| Günaydın (2009) | CL         | 72.00 | 26.79 | 1.21  | 31.55  | 16.60  | 14.70   | 17.71                    |
| Günaydın (2009) | CL         | 64.00 | 35.75 | 0.25  | 34.60  | 16.76  | 17.50   | 16.93                    |
| Günaydın (2009) | CL         | 83.30 | 15.49 | 1.21  | 31.55  | 16.60  | 14.70   | 17.71                    |
| Günaydın (2009) | CL         | 47.00 | 41.08 | 11.92 | 33.40  | 20.23  | 13.75   | 17.97                    |
| Günaydın (2009) | CL         | 37.00 | 42.62 | 20.38 | 30.35  | 18.89  | 12.40   | 18.76                    |
| Günaydın (2009) | CL         | 52.00 | 33.73 | 14.27 | 29.45  | 17.55  | 12.30   | 18.67                    |
| Günaydın (2009) | CL         | 61.00 | 31.38 | 7.62  | 31.35  | 14.21  | 15.90   | 17.71                    |
| Günaydın (2009) | CL         | 60.00 | 35.25 | 4.75  | 32.60  | 16.16  | 14.90   | 18.03                    |
| Günaydın (2009) | CL         | 51.00 | 37.95 | 11.05 | 28.35  | 13.68  | 11.00   | 19.28                    |
| Günaydın (2009) | CL         | 65.00 | 31.50 | 3.50  | 41.70  | 23.84  | 19.80   | 16.28                    |
| Günaydın (2009) | GC         | 37.50 | 28.90 | 33.60 | 46.25  | 26.11  | 14.80   | 17.75                    |
| Günaydın (2009) | GC         | 41.50 | 26.70 | 31.80 | 39.20  | 25.15  | 18.20   | 16.67                    |
| Günaydın (2009) | GC         | 37.00 | 28.70 | 34.30 | 40.80  | 23.65  | 18.80   | 16.43                    |
| Günaydın (2009) | GC         | 21.00 | 33.20 | 45.80 | 34.95  | 19.65  | 14.20   | 18.34                    |
| Günaydın (2009) | GC         | 34.00 | 27.79 | 38.21 | 33.20  | 15.80  | 12.90   | 18.57                    |
| Günaydın (2009) | GC         | 32.50 | 32.66 | 34.84 | 37.80  | 20.36  | 14.90   | 17.32                    |
| Günaydın (2009) | GC         | 24.00 | 45.61 | 30.39 | 35.30  | 19.71  | 13.10   | 18.65                    |
| Günaydın (2009) | GC         | 36.00 | 25.22 | 38.78 | 39.90  | 19.69  | 18.50   | 17.14                    |
| Günaydın (2009) | GC         | 13.00 | 19.90 | 67.10 | 28.20  | 15.00  | 7.60    | 20.51                    |
| Günaydın (2009) | GC         | 38.00 | 25.81 | 36.19 | 27.60  | 17.50  | 12.20   | 18.85                    |
| Günaydın (2009) | GC         | 33.00 | 32.89 | 34.11 | 49.30  | 22.60  | 18.20   | 17.03                    |
| Günaydın (2009) | GM         | 40.00 | 28.64 | 31.36 | 40.20  | 26.00  | 13.85   | 17.55                    |
| Günaydın (2009) | GM         | 40.00 | 28.69 | 31.31 | 40.20  | 26.00  | 13.85   | 17.55                    |
| Günaydın (2009) | GM         | 50.00 | 25.31 | 24.69 | 49.10  | 26.61  | 20.40   | 16.56                    |
| Günaydın (2009) | GM         | 45.00 | 17.25 | 37.75 | 50.90  | 26.13  | 19.40   | 16.36                    |
| Günaydın (2009) | MH         | 60.00 | 36.48 | 3.52  | 53.00  | 29.84  | 19.40   | 16.09                    |
| Günaydın (2009) | MI         | 59.00 | 34.61 | 6.39  | 47.90  | 28.85  | 18.00   | 16.36                    |
| Günaydın (2009) | MI         | 74.00 | 24.24 | 1.76  | 49.35  | 28.41  | 21.95   | 16.39                    |
| Günaydın (2009) | ML         | 53.00 | 37.00 | 10.00 | 26.95  | 14.55  | 10.40   | 19.24                    |
| Günaydın (2009) | SC         | 47.00 | 52.25 | 0.75  | 43.00  | 23.36  | 17.45   | 17.25                    |
| Günaydın (2009) | SC         | 37.00 | 59.42 | 3.58  | 39.00  | 22.60  | 16.00   | 18.46                    |
| Günaydın (2009) | SC         | 42.00 | 51.01 | 6.99  | 41.40  | 23.77  | 16.70   | 17.77                    |
| Günaydın (2009) | SC         | 27.00 | 71.26 | 1.74  | 33.75  | 18.66  | 13.70   | 19.08                    |
| Günaydın (2009) | SC         | 35.00 | 63.79 | 1.21  | 36.50  | 21.33  | 13.45   | 19.20                    |

| Study reference     | Soil types | F (%) | S (%) | G (%) | LL (%) | PL (%) | OMC (%) | MDD (kN/m <sup>3</sup> ) |
|---------------------|------------|-------|-------|-------|--------|--------|---------|--------------------------|
| Günaydın (2009)     | SC         | 42.00 | 57.35 | 0.65  | 38.20  | 22.85  | 16.20   | 18.05                    |
| Günaydın (2009)     | SC         | 37.00 | 51.14 | 11.86 | 48.80  | 25.87  | 17.85   | 16.69                    |
| Günaydın (2009)     | SC         | 48.00 | 47.47 | 4.53  | 50.60  | 24.02  | 18.40   | 16.28                    |
| Günaydın (2009)     | SC         | 45.00 | 43.98 | 11.02 | 46.90  | 26.24  | 16.20   | 17.74                    |
| Günaydın (2009)     | SC         | 41.00 | 45.25 | 13.75 | 41.70  | 19.85  | 15.80   | 17.91                    |
| Günaydın (2009)     | SC         | 33.00 | 33.12 | 33.88 | 46.70  | 19.78  | 13.30   | 18.12                    |
| Günaydın (2009)     | SC         | 31.00 | 57.52 | 11.48 | 33.00  | 17.29  | 14.57   | 19.93                    |
| Günaydın (2009)     | SC         | 44.00 | 43.93 | 12.07 | 40.30  | 19.50  | 16.15   | 18.50                    |
| Günaydın (2009)     | SC         | 32.00 | 56.36 | 11.64 | 36.10  | 22.27  | 18.00   | 17.78                    |
| Günaydın (2009)     | SC         | 31.00 | 55.40 | 13.60 | 45.50  | 23.96  | 18.20   | 17.05                    |
| Günaydın (2009)     | SC         | 38.00 | 37.70 | 24.30 | 37.70  | 20.19  | 16.05   | 17.87                    |
| Günaydın (2009)     | SC         | 37.00 | 32.32 | 30.68 | 43.00  | 24.46  | 17.40   | 17.01                    |
| Günaydın (2009)     | SC         | 23.00 | 69.09 | 7.91  | 33.90  | 18.89  | 14.80   | 17.93                    |
| Günaydın (2009)     | SC         | 33.50 | 37.40 | 29.10 | 39.05  | 25.20  | 18.50   | 16.77                    |
| Günaydın (2009)     | SC         | 45.50 | 30.90 | 23.60 | 42.45  | 25.96  | 17.80   | 16.83                    |
| Günaydın (2009)     | SC         | 40.00 | 57.00 | 3.00  | 33.70  | 23.48  | 13.80   | 18.24                    |
| Günaydın (2009)     | SC         | 39.00 | 37.70 | 23.30 | 34.10  | 21.82  | 14.30   | 18.10                    |
| Günaydın (2009)     | SC         | 41.00 | 45.75 | 13.25 | 32.50  | 19.75  | 13.20   | 18.54                    |
| Günaydın (2009)     | SC         | 32.00 | 47.63 | 20.37 | 36.50  | 21.50  | 16.40   | 16.62                    |
| Günaydın (2009)     | SC         | 42.00 | 48.68 | 9.32  | 36.20  | 22.55  | 11.70   | 18.75                    |
| Günaydın (2009)     | SC         | 33.00 | 53.29 | 13.71 | 33.60  | 20.42  | 12.50   | 18.45                    |
| Günaydın (2009)     | SC         | 38.00 | 52.93 | 9.07  | 30.40  | 16.92  | 10.90   | 19.32                    |
| Günaydın (2009)     | SC         | 42.00 | 48.68 | 9.32  | 36.20  | 22.55  | 11.70   | 18.75                    |
| Günaydın (2009)     | SC         | 33.00 | 53.29 | 13.71 | 33.60  | 20.42  | 12.50   | 18.45                    |
| Günaydın (2009)     | SC         | 38.00 | 52.93 | 9.07  | 30.40  | 16.92  | 10.90   | 19.32                    |
| Günaydın (2009)     | SC         | 45.00 | 45.50 | 9.50  | 36.80  | 15.86  | 14.60   | 18.02                    |
| Günaydın (2009)     | SC         | 45.00 | 45.50 | 9.50  | 36.80  | 15.86  | 14.60   | 18.02                    |
| Günaydın (2009)     | SC         | 19.00 | 48.95 | 32.05 | 35.15  | 20.05  | 12.40   | 18.89                    |
| Günaydın (2009)     | SC         | 15.00 | 54.18 | 30.82 | 23.10  | 15.73  | 9.30    | 19.77                    |
| Günaydın (2009)     | SC         | 27.00 | 59.84 | 13.16 | 25.00  | 16.45  | 10.70   | 19.81                    |
| Günaydın (2009)     | SC         | 24.00 | 49.04 | 26.96 | 32.00  | 16.16  | 10.00   | 19.95                    |
| Günaydın (2009)     | SC         | 42.00 | 52.48 | 5.52  | 30.80  | 15.74  | 10.50   | 19.32                    |
| Günaydın (2009)     | SC         | 47.00 | 41.77 | 11.23 | 41.40  | 24.59  | 15.60   | 17.51                    |
| <b>Study-2</b>      |            |       |       |       |        |        |         |                          |
| Wang and Yin (2020) | CL         | 73.00 | 27.00 | 0.00  | 32.00  | 15.00  | 16.00   | 17.85                    |
| Wang and Yin (2020) | CL         | 91.00 | 9.00  | 0.00  | 46.00  | 17.00  | 18.00   | 17.17                    |
| Wang and Yin (2020) | CL         | 94.00 | 6.00  | 0.00  | 36.00  | 18.00  | 18.20   | 17.07                    |
| Wang and Yin (2020) | CL         | 92.00 | 8.00  | 0.00  | 43.00  | 21.00  | 18.20   | 16.97                    |
| Wang and Yin (2020) | CL         | 92.00 | 8.00  | 0.00  | 40.00  | 19.00  | 17.20   | 16.97                    |
| Wang and Yin (2020) | CL         | 94.00 | 6.00  | 0.00  | 38.00  | 21.00  | 19.00   | 16.87                    |
| Wang and Yin (2020) | CL         | 94.00 | 6.00  | 0.00  | 43.00  | 20.00  | 18.20   | 17.07                    |
| Wang and Yin (2020) | CL         | 80.00 | 20.00 | 0.00  | 38.00  | 17.00  | 16.00   | 17.95                    |
| Wang and Yin (2020) | CL         | 84.00 | 16.00 | 0.00  | 37.00  | 16.00  | 16.60   | 17.56                    |
| Wang and Yin (2020) | CL         | 82.00 | 18.00 | 0.00  | 34.00  | 14.00  | 16.00   | 17.85                    |
| Wang and Yin (2020) | CL         | 81.00 | 19.00 | 0.00  | 33.00  | 18.00  | 15.00   | 17.95                    |
| Wang and Yin (2020) | CL         | 90.00 | 10.00 | 0.00  | 33.00  | 18.00  | 17.00   | 17.66                    |
| Wang and Yin (2020) | CL         | 88.00 | 12.00 | 0.00  | 39.00  | 16.00  | 18.60   | 17.17                    |

| Study reference     | Soil types | F (%) | S (%) | G (%) | LL (%) | PL (%) | OMC (%) | MDD (kN/m <sup>3</sup> ) |
|---------------------|------------|-------|-------|-------|--------|--------|---------|--------------------------|
| Wang and Yin (2020) | CL         | 97.00 | 3.00  | 0.00  | 49.00  | 21.00  | 20.00   | 16.38                    |
| Wang and Yin (2020) | CL         | 94.00 | 3.00  | 3.00  | 49.00  | 20.00  | 20.00   | 16.38                    |
| Wang and Yin (2020) | CL         | 95.00 | 5.00  | 0.00  | 45.00  | 20.00  | 19.50   | 16.48                    |
| Wang and Yin (2020) | CL         | 87.00 | 13.00 | 0.00  | 34.00  | 17.00  | 17.00   | 17.36                    |
| Wang and Yin (2020) | CL         | 95.00 | 5.00  | 0.00  | 43.00  | 20.00  | 18.50   | 16.87                    |
| Wang and Yin (2020) | CL         | 92.00 | 8.00  | 0.00  | 43.00  | 21.00  | 20.00   | 16.48                    |
| Wang and Yin (2020) | CL         | 94.00 | 6.00  | 0.00  | 35.00  | 16.00  | 18.40   | 17.17                    |
| Wang and Yin (2020) | CL         | 96.00 | 4.00  | 0.00  | 38.00  | 17.00  | 19.50   | 16.78                    |
| Wang and Yin (2020) | CL         | 96.00 | 4.00  | 0.00  | 34.00  | 21.00  | 17.00   | 17.36                    |
| Wang and Yin (2020) | CL         | 90.00 | 10.00 | 0.00  | 33.00  | 20.00  | 17.50   | 17.46                    |
| Wang and Yin (2020) | CL         | 95.00 | 5.00  | 0.00  | 35.00  | 22.00  | 17.50   | 17.07                    |
| Wang and Yin (2020) | CL         | 73.00 | 27.00 | 0.00  | 27.00  | 17.00  | 16.00   | 18.05                    |
| Wang and Yin (2020) | CL         | 87.00 | 13.00 | 0.00  | 27.00  | 17.00  | 17.30   | 17.46                    |
| Wang and Yin (2020) | CL         | 90.00 | 10.00 | 0.00  | 30.00  | 19.00  | 17.80   | 17.17                    |
| Wang and Yin (2020) | CL         | 95.00 | 5.00  | 0.00  | 36.00  | 20.00  | 18.70   | 16.97                    |
| Wang and Yin (2020) | CL         | 91.00 | 9.00  | 0.00  | 31.00  | 18.00  | 18.00   | 17.17                    |
| Wang and Yin (2020) | CL         | 89.00 | 11.00 | 0.00  | 33.00  | 18.00  | 18.00   | 17.07                    |
| Wang and Yin (2020) | CL         | 90.00 | 10.00 | 0.00  | 32.00  | 18.00  | 17.00   | 17.17                    |
| Wang and Yin (2020) | CL         | 90.00 | 10.00 | 0.00  | 36.00  | 19.00  | 20.00   | 16.58                    |
| Wang and Yin (2020) | CL         | 93.00 | 7.00  | 0.00  | 39.00  | 22.00  | 21.50   | 16.28                    |
| Wang and Yin (2020) | CL         | 81.00 | 19.00 | 0.00  | 23.00  | 19.00  | 17.50   | 17.17                    |
| Wang and Yin (2020) | CL         | 88.00 | 12.00 | 0.00  | 31.00  | 18.00  | 17.60   | 17.17                    |
| Wang and Yin (2020) | CL         | 95.00 | 5.00  | 0.00  | 41.00  | 22.00  | 20.50   | 16.09                    |
| Wang and Yin (2020) | CL         | 81.00 | 19.00 | 0.00  | 36.00  | 18.00  | 18.90   | 17.36                    |
| Wang and Yin (2020) | CL         | 85.00 | 15.00 | 0.00  | 36.00  | 20.00  | 18.00   | 17.17                    |
| Wang and Yin (2020) | CL         | 80.00 | 20.00 | 0.00  | 35.00  | 16.00  | 16.20   | 17.76                    |
| Wang and Yin (2020) | CL         | 75.00 | 25.00 | 0.00  | 36.00  | 20.00  | 16.20   | 17.36                    |
| Wang and Yin (2020) | CL         | 78.00 | 22.00 | 0.00  | 39.00  | 18.00  | 16.70   | 17.36                    |
| Wang and Yin (2020) | CL         | 75.00 | 25.00 | 0.00  | 29.00  | 18.00  | 17.20   | 17.27                    |
| Wang and Yin (2020) | CL         | 85.00 | 15.00 | 0.00  | 31.00  | 17.00  | 16.20   | 17.76                    |
| Wang and Yin (2020) | CL         | 73.00 | 27.00 | 0.00  | 29.00  | 19.00  | 16.50   | 17.76                    |
| Wang and Yin (2020) | CL         | 72.00 | 28.00 | 0.00  | 28.00  | 18.00  | 15.30   | 18.05                    |
| Wang and Yin (2020) | CL         | 85.00 | 15.00 | 0.00  | 33.00  | 20.00  | 18.50   | 16.97                    |
| Wang and Yin (2020) | CL         | 90.00 | 10.00 | 0.00  | 35.00  | 20.00  | 17.00   | 16.87                    |
| Wang and Yin (2020) | CL         | 75.00 | 25.00 | 0.00  | 32.00  | 20.00  | 19.00   | 16.87                    |
| Wang and Yin (2020) | CL-ML      | 81.00 | 19.00 | 0.00  | 27.00  | 21.00  | 17.00   | 17.46                    |
| Wang and Yin (2020) | CH         | 97.00 | 3.00  | 0.00  | 52.00  | 25.00  | 19.80   | 16.38                    |
| Wang and Yin (2020) | CH         | 99.00 | 1.00  | 0.00  | 54.00  | 25.00  | 22.30   | 15.50                    |
| Wang and Yin (2020) | CH         | 99.00 | 1.00  | 0.00  | 64.00  | 27.00  | 24.80   | 14.81                    |
| Wang and Yin (2020) | CH         | 98.00 | 2.00  | 0.00  | 56.00  | 25.00  | 23.30   | 15.30                    |
| Wang and Yin (2020) | CH         | 98.00 | 2.00  | 0.00  | 66.00  | 27.00  | 24.50   | 14.91                    |
| Wang and Yin (2020) | CH         | 98.00 | 2.00  | 0.00  | 63.00  | 26.00  | 24.30   | 14.91                    |
| Wang and Yin (2020) | CH         | 98.00 | 2.00  | 0.00  | 50.00  | 23.00  | 23.00   | 15.60                    |
| Wang and Yin (2020) | CH         | 98.00 | 2.00  | 0.00  | 62.00  | 28.00  | 25.50   | 14.91                    |
| Wang and Yin (2020) | CH         | 98.00 | 2.00  | 0.00  | 64.00  | 29.00  | 26.00   | 14.62                    |
| Wang and Yin (2020) | CH         | 98.00 | 2.00  | 0.00  | 59.00  | 27.00  | 24.50   | 15.40                    |
| Wang and Yin (2020) | CH         | 98.00 | 2.00  | 0.00  | 51.00  | 22.00  | 22.50   | 15.79                    |

| Study reference            | Soil types | F (%)  | S (%) | G (%) | LL (%) | PL (%) | OMC (%) | MDD (kN/m <sup>3</sup> ) |
|----------------------------|------------|--------|-------|-------|--------|--------|---------|--------------------------|
| Wang and Yin (2020)        | CH         | 97.00  | 3.00  | 0.00  | 54.00  | 25.00  | 23.00   | 15.60                    |
| Wang and Yin (2020)        | CH         | 99.00  | 1.00  | 0.00  | 54.00  | 22.00  | 22.00   | 16.19                    |
| Wang and Yin (2020)        | ML         | 90.00  | 10.00 | 0.00  | 35.00  | 20.00  | 17.00   | 17.36                    |
| Wang and Yin (2020)        | CH         | 83.00  | 17.00 | 0.00  | 69.00  | 26.00  | 24.80   | 14.72                    |
| Wang and Yin (2020)        | CL         | 33.00  | 65.00 | 2.00  | 30.00  | 18.00  | 13.90   | 18.44                    |
| Wang and Yin (2020)        | CL         | 96.00  | 4.00  | 0.00  | 37.00  | 19.00  | 18.00   | 16.68                    |
| Wang and Yin (2020)        | CL         | 93.00  | 4.00  | 3.00  | 49.00  | 27.00  | 21.00   | 16.09                    |
| Wang and Yin (2020)        | CL         | 90.00  | 10.00 | 0.00  | 42.00  | 24.00  | 20.00   | 17.07                    |
| Wang and Yin (2020)        | CH         | 90.00  | 9.00  | 1.00  | 50.00  | 23.00  | 21.00   | 15.99                    |
| Wang and Yin (2020)        | CL         | 95.00  | 5.00  | 0.00  | 27.00  | 16.00  | 16.00   | 17.46                    |
| Wang and Yin (2020)        | CH         | 62.80  | 30.20 | 7.00  | 56.00  | 29.00  | 20.30   | 15.11                    |
| Wang and Yin (2020)        | CH         | 53.80  | 26.20 | 20.00 | 56.00  | 29.00  | 19.00   | 16.28                    |
| Wang and Yin (2020)        | CL         | 69.20  | 30.80 | 0.00  | 39.70  | 7.70   | 15.40   | 17.66                    |
| Wang and Yin (2020)        | CL         | 75.80  | 24.20 | 0.00  | 42.30  | 6.10   | 16.50   | 17.56                    |
| Wang and Yin (2020)        | CL         | 80.70  | 19.30 | 0.00  | 49.30  | 7.40   | 17.70   | 16.87                    |
| Wang and Yin (2020)        | SC         | 27.80  | 45.80 | 26.40 | 61.10  | 14.80  | 12.80   | 18.34                    |
| Wang and Yin (2020)        | SP-SC      | 8.80   | 83.60 | 7.60  | 31.20  | 19.30  | 10.80   | 19.13                    |
| Wang and Yin (2020)        | SW-SC      | 9.60   | 77.30 | 13.10 | 30.40  | 18.80  | 9.80    | 19.72                    |
| Wang and Yin (2020)        | GC         | 21.30  | 31.90 | 46.80 | 63.20  | 13.40  | 11.40   | 18.64                    |
| Wang and Yin (2020)        | GP-GC      | 9.40   | 41.90 | 48.70 | 37.80  | 14.70  | 8.40    | 20.60                    |
| Wang and Yin (2020)        | GW-GC      | 8.60   | 44.30 | 47.10 | 29.50  | 14.10  | 7.00    | 21.48                    |
| Wang and Yin (2020)        | CL         | 97.00  | 3.00  | 0.00  | 40.00  | 23.00  | 22.00   | 15.89                    |
| Wang and Yin (2020)        | SC         | 44.00  | 56.00 | 0.00  | 16.00  | 9.00   | 9.00    | 20.50                    |
| Wang and Yin (2020)        | SC         | 45.00  | 53.00 | 2.00  | 21.80  | 16.10  | 11.80   | 18.54                    |
| Wang and Yin (2020)        | CL         | 73.00  | 27.00 | 0.00  | 28.00  | 20.00  | 14.60   | 17.76                    |
| Wang and Yin (2020)        | CL         | 84.00  | 16.00 | 0.00  | 28.00  | 18.00  | 17.60   | 17.27                    |
| Wang and Yin (2020)        | CL         | 97.00  | 3.00  | 0.00  | 34.00  | 21.00  | 19.60   | 16.78                    |
| Wang and Yin (2020)        | CL         | 96.00  | 4.00  | 0.00  | 33.00  | 18.00  | 15.50   | 17.46                    |
| Wang and Yin (2020)        | CL         | 76.00  | 24.00 | 0.00  | 40.00  | 15.00  | 16.80   | 17.27                    |
| Wang and Yin (2020)        | CL         | 67.00  | 33.00 | 0.00  | 41.00  | 15.00  | 15.70   | 16.78                    |
| Wang and Yin (2020)        | CH         | 97.00  | 3.00  | 0.00  | 51.00  | 19.00  | 19.40   | 16.28                    |
| Wang and Yin (2020)        | CH         | 92.00  | 8.00  | 0.00  | 52.00  | 18.00  | 20.80   | 15.60                    |
| Wang and Yin (2020)        | CH         | 87.00  | 13.00 | 0.00  | 53.00  | 19.00  | 18.60   | 16.48                    |
| Wang and Yin (2020)        | CH         | 95.00  | 5.00  | 0.00  | 70.00  | 27.00  | 25.30   | 14.62                    |
| Wang and Yin (2020)        | ML         | 86.00  | 14.00 | 0.00  | 47.00  | 28.00  | 22.00   | 15.89                    |
| Wang and Yin (2020)        | SM         | 44.00  | 56.00 | 0.00  | 16.00  | 9.00   | 9.00    | 20.01                    |
| Wang and Yin (2020)        | CL         | 85.00  | 15.00 | 0.00  | 34.00  | 18.00  | 16.00   | 18.05                    |
| Wang and Yin (2020)        | CL         | 99.00  | 1.00  | 0.00  | 42.00  | 23.00  | 18.50   | 16.78                    |
| Wang and Yin (2020)        | SC         | 41.00  | 59.00 | 0.00  | 28.00  | 14.00  | 13.50   | 18.54                    |
| Wang and Yin (2020)        | CH         | 100.00 | 0.00  | 0.00  | 69.00  | 31.00  | 30.80   | 13.93                    |
| Wang and Yin (2020)        | MH         | 100.00 | 0.00  | 0.00  | 54.00  | 31.00  | 31.00   | 13.73                    |
| Wang and Yin (2020)        | MH         | 67.00  | 33.00 | 0.00  | 50.40  | 32.50  | 23.10   | 15.60                    |
| Wang and Yin (2020)        | ML         | 83.90  | 16.10 | 0.00  | 25.00  | 21.00  | 13.60   | 16.28                    |
| Wang and Yin (2020)        | CL         | 54.00  | 46.00 | 0.00  | 32.00  | 12.00  | 13.70   | 17.85                    |
| Wang and Yin (2020)        | MH         | 96.00  | 4.00  | 0.00  | 64.00  | 26.00  | 26.00   | 14.03                    |
| <b>Study-3</b>             |            |        |       |       |        |        |         |                          |
| Bardhan and Asteris (2023) | CH         | 60.00  | 29.00 | 11.00 | 51.00  | 22.00  | 20.8    | 15.75                    |

| Study reference            | Soil types | F (%) | S (%) | G (%) | LL (%) | PL (%) | OMC (%) | MDD (kN/m <sup>3</sup> ) |
|----------------------------|------------|-------|-------|-------|--------|--------|---------|--------------------------|
| Bardhan and Asteris (2023) | CH         | 54.00 | 31.00 | 15.00 | 54.00  | 24.25  | 21.0    | 16.00                    |
| Bardhan and Asteris (2023) | CH         | 71.00 | 12.00 | 17.00 | 56.00  | 26.25  | 24.0    | 15.25                    |
| Bardhan and Asteris (2023) | CH         | 61.00 | 35.00 | 4.00  | 53.00  | 26.50  | 20.0    | 16.00                    |
| Bardhan and Asteris (2023) | CI         | 52.00 | 38.00 | 10.00 | 44.00  | 21.00  | 17.0    | 17.50                    |
| Bardhan and Asteris (2023) | CI         | 50.00 | 31.00 | 19.00 | 42.00  | 22.25  | 17.3    | 17.25                    |
| Bardhan and Asteris (2023) | CI         | 70.00 | 21.00 | 9.00  | 41.00  | 20.25  | 19.0    | 17.00                    |
| Bardhan and Asteris (2023) | CI         | 61.00 | 34.00 | 5.00  | 39.00  | 19.75  | 17.0    | 17.50                    |
| Bardhan and Asteris (2023) | CI         | 51.00 | 31.00 | 18.00 | 36.00  | 19.50  | 15.0    | 18.00                    |
| Bardhan and Asteris (2023) | CL         | 60.00 | 18.00 | 22.00 | 35.00  | 19.25  | 16.3    | 17.50                    |
| Bardhan and Asteris (2023) | CL         | 71.00 | 22.00 | 7.00  | 36.00  | 22.25  | 17.0    | 17.00                    |
| Bardhan and Asteris (2023) | CL         | 70.00 | 25.00 | 5.00  | 33.00  | 17.75  | 16.0    | 17.50                    |
| Bardhan and Asteris (2023) | CL         | 80.00 | 11.00 | 9.00  | 34.00  | 18.75  | 18.0    | 17.00                    |
| Bardhan and Asteris (2023) | CL         | 56.00 | 32.00 | 12.00 | 29.00  | 14.25  | 16.0    | 18.00                    |
| Bardhan and Asteris (2023) | CL         | 60.00 | 27.00 | 13.00 | 43.00  | 21.00  | 17.8    | 17.00                    |
| Bardhan and Asteris (2023) | SC         | 30.00 | 31.00 | 39.00 | 31.00  | 16.00  | 12.3    | 19.00                    |
| Bardhan and Asteris (2023) | SC         | 31.00 | 51.00 | 18.00 | 30.00  | 17.00  | 12.3    | 19.50                    |
| Bardhan and Asteris (2023) | SC         | 23.00 | 49.00 | 28.00 | 31.00  | 19.25  | 12.0    | 19.25                    |
| Bardhan and Asteris (2023) | SC         | 22.00 | 52.00 | 26.00 | 30.00  | 18.75  | 12.0    | 19.25                    |
| Bardhan and Asteris (2023) | SC         | 39.00 | 49.00 | 12.00 | 30.00  | 17.75  | 12.0    | 19.25                    |
